# Supplementary material
Source: ML conference proceedings conference paper supplement (https://openreview.net/forum?id=-vhO2VPjbVa)
Supplement: supplementary_material [file attachment]

Supplementary Materials for:  
*Natural images are more informative for interpreting CNN  
activations than synthetic feature visualizations*

## 1 Details on Experimental Setup

The selection of feature maps used in Experiment I is shown in Table 1; the selection of feature maps used in Experiment II is shown in Table 2.

### 1.1 Selection of Feature Maps

| Layer   | Branch       | Feature Map | Layer   | Branch       | Feature Map |
|---------|--------------|-------------|---------|--------------|-------------|
| mixed3a | $1 \times 1$ | 25          | mixed4d | $1 \times 1$ | 95          |
|         | $3 \times 3$ | 189         |         | $3 \times 3$ | 342         |
|         | $5 \times 5$ | 197         |         | $5 \times 5$ | 451         |
|         | Pool         | 227         |         | Pool         | 483         |
|         | Pool*        | 230         |         | Pool*        | 516         |
| mixed3b | $1 \times 1$ | 64          | mixed4e | $1 \times 1$ | 231         |
|         | $3 \times 3$ | 178         |         | $3 \times 3$ | 524         |
|         | $5 \times 5$ | 390         |         | $5 \times 5$ | 656         |
|         | Pool         | 430         |         | Pool         | 816         |
|         | Pool*        | 462         |         | Pool*        | 809         |
| mixed4a | $1 \times 1$ | 68          | mixed5a | $1 \times 1$ | 229         |
|         | $3 \times 3$ | 257         |         | $3 \times 3$ | 278         |
|         | $5 \times 5$ | 427         |         | $5 \times 5$ | 636         |
|         | Pool         | 486         |         | Pool         | 743         |
|         | Pool*        | 501         |         | Pool*        | 720         |
| mixed4b | $1 \times 1$ | 45          | mixed5b | $1 \times 1$ | 119         |
|         | $3 \times 3$ | 339         |         | $3 \times 3$ | 684         |
|         | $5 \times 5$ | 438         |         | $5 \times 5$ | 844         |
|         | Pool         | 491         |         | Pool         | 1007        |
|         | Pool*        | 465         |         | Pool*        | 946         |
| mixed4c | $1 \times 1$ | 94          |         |              |             |
|         | $3 \times 3$ | 247         |         |              |             |
|         | $5 \times 5$ | 432         |         |              |             |
|         | Pool         | 496         |         |              |             |
|         | Pool*        | 449         |         |              |             |

Table 1: Feature maps analyzed in Experiment I. For each of the 9 layers with an Inception module, one randomly chosen feature map per branch ( $1 \times 1$ ,  $3 \times 3$ ,  $5 \times 5$  and Pool) and one additional hand-picked feature map (highlighted with \*) are used.

| Layer   | Branch       | Feature Map for<br>Batch Block (A-D) |     |     |     |
|---------|--------------|--------------------------------------|-----|-----|-----|
|         |              | A                                    | B   | C   | D   |
| mixed3a | $1 \times 1$ | 25                                   | 14  | 12  | 53  |
|         | $3 \times 3$ | 189                                  | 97  | 171 | 106 |
|         | $5 \times 5$ | 197                                  | 203 | 212 | 204 |
|         | Pool         | 227                                  | 238 | 232 | 247 |
| mixed4a | $1 \times 1$ | 68                                   | 33  | 45  | 17  |
|         | $3 \times 3$ | 257                                  | 355 | 321 | 200 |
|         | $5 \times 5$ | 427                                  | 425 | 429 | 423 |
|         | Pool         | 486                                  | 497 | 478 | 506 |
| mixed4c | $1 \times 1$ | 94                                   | 53  | 59  | 95  |
|         | $3 \times 3$ | 247                                  | 237 | 357 | 209 |
|         | $5 \times 5$ | 432                                  | 402 | 400 | 416 |
|         | Pool         | 496                                  | 498 | 473 | 497 |
| mixed4e | $1 \times 1$ | 231                                  | 83  | 6   | 89  |
|         | $3 \times 3$ | 524                                  | 323 | 401 | 373 |
|         | $5 \times 5$ | 656                                  | 624 | 642 | 620 |
|         | Pool         | 816                                  | 755 | 724 | 783 |
| mixed5b | $1 \times 1$ | 119                                  | 14  | 266 | 300 |
|         | $3 \times 3$ | 684                                  | 592 | 657 | 481 |
|         | $5 \times 5$ | 844                                  | 829 | 839 | 875 |
|         | Pool         | 1007                                 | 913 | 927 | 903 |

Table 2: Feature maps analyzed in Experiment II. Four sets of feature maps (batch blocks A to D) are sampled: For every second layer with an Inception module (5 layers in total), one feature map is randomly selected per branch of the Inception module ( $1 \times 1$ ,  $3 \times 3$ ,  $5 \times 5$  and Pool). For the practice, catch and intuitiveness trials additional randomly chosen feature maps are used.

| Subject | Order of presentation schemes (0-3) and batch-blocks (A-D) |       |       |       | Batches<br>Practice      Main |                            | Order of synthetic and natural |
|---------|------------------------------------------------------------|-------|-------|-------|-------------------------------|----------------------------|--------------------------------|
| 1       | 0 (A)                                                      | 1 (B) | 2 (C) | 3 (D) |                               | natural: 1<br>synthetic: 2 | natural - synthetic            |
| 2       | 0 (B)                                                      | 2 (D) | 1 (C) | 3 (A) |                               |                            |                                |
| 3       | 3 (B)                                                      | 1 (D) | 2 (A) | 0 (C) |                               |                            |                                |
| 4       | 3 (C)                                                      | 2 (B) | 1 (A) | 0 (D) |                               |                            |                                |
| 5       | see subject 1-4                                            |       |       |       | 0                             | natural: 3<br>synthetic: 4 | synthetic - natural            |
| 6       |                                                            |       |       |       |                               |                            |                                |
| 7       |                                                            |       |       |       |                               |                            |                                |
| 8       |                                                            |       |       |       |                               |                            |                                |
| 9       | see subject 1-4                                            |       |       |       |                               | natural: 5<br>synthetic: 6 | natural - synthetic            |
| 10      |                                                            |       |       |       |                               |                            |                                |
| 11      |                                                            |       |       |       |                               |                            |                                |
| 12      |                                                            |       |       |       |                               |                            |                                |
| 13      | see subject 1-4                                            |       |       |       |                               | natural: 7<br>synthetic: 8 | synthetic - natural            |
|         |                                                            |       |       |       |                               |                            |                                |

Table 3: **Counter-balancing of conditions in Experiment II.** In total, 13 naive and 10 lay participants are tested. Each “batch blocks” contains 20 feature maps (sampled from five layers and all Inception module branches). Batches indicate which batch number the natural query (and reference images) are taken from.

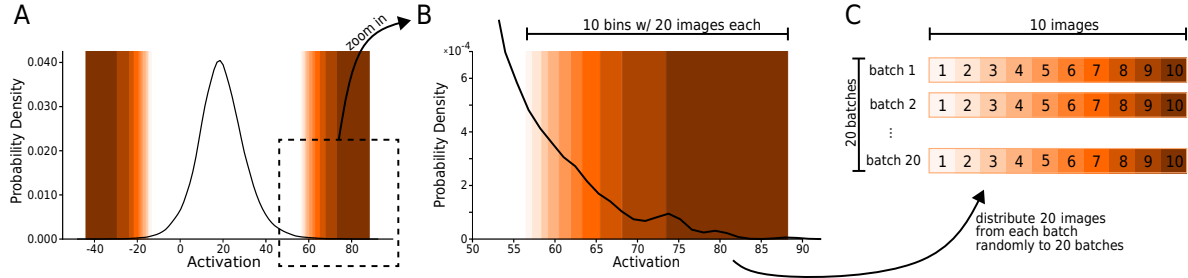

Figure 1: Sampling of natural images for Experiment I and II. **A:** Distribution of activations. For an example channel (mixed3a, kernel size  $1 \times 1$ , feature map 25), the smoothed distribution of activations for all 50,000 ImageNet validation images is plotted. The natural stimuli for the experiment are taken from the tails of the distribution (shaded background). **B:** Zoomed-in tail of activations distribution. In the presentation schemes with 9 images, 10 bins with 20 images each are created (10 because of 9 reference plus 1 query image). **C:** In order to obtain 20 batches with 10 images each, the 20 images from one bin are randomly distributed to the 20 batches. This guarantees that each batch contains a fair selection of extremely activating images. The query images are *always* sampled from the most extreme bins in order to give the best signal possible. In the case of the presentation schemes with 1 reference image, the number of bins in B is reduced to 2 and the number of images per batch in C is also reduced to 2.

## 2 Screenshots

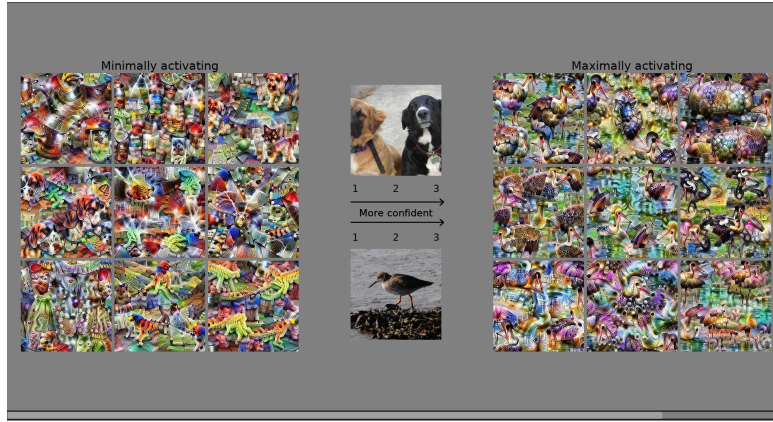

(a) Screen at the beginning of a trial. The question is which of the two natural images at the center of the screen also strongly activates the CNN feature map given the reference images on the side.

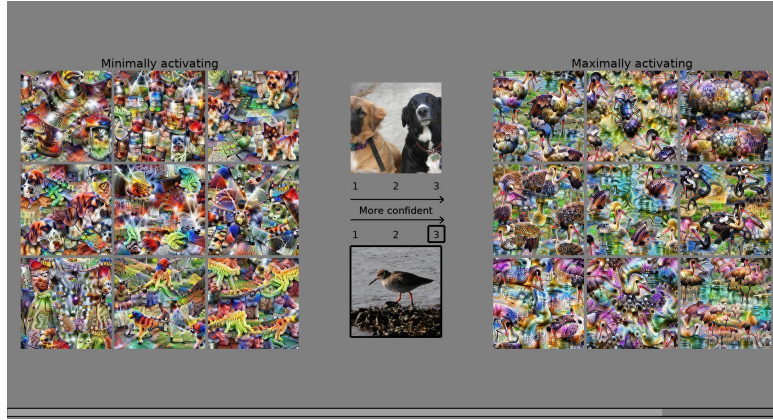

(b) Screen including a subject's answer visualized by black boxes around the image and the confidence level. A subject indicates which natural image in the center would also be a strongly activating image by clicking on the number corresponding to his/her confidence level (1: not confident, 2: somewhat confident, 3: confident). The time until a participant selects an answer is recorded ("reaction time").

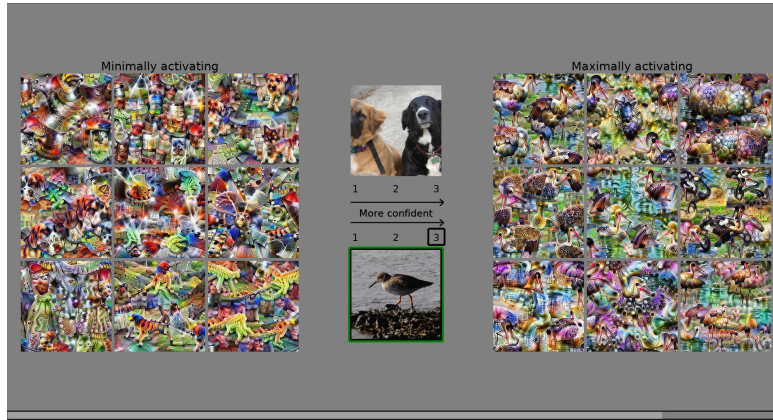

(c) Screen including a subject's answer (black boxes) and feedback on which image is indeed also a strongly activating image (green box).

Figure 2: Screenshots of the experimental setup (Forward Simulation Task). The progress bar at the bottom of the screen indicates the progress within one block of trials.

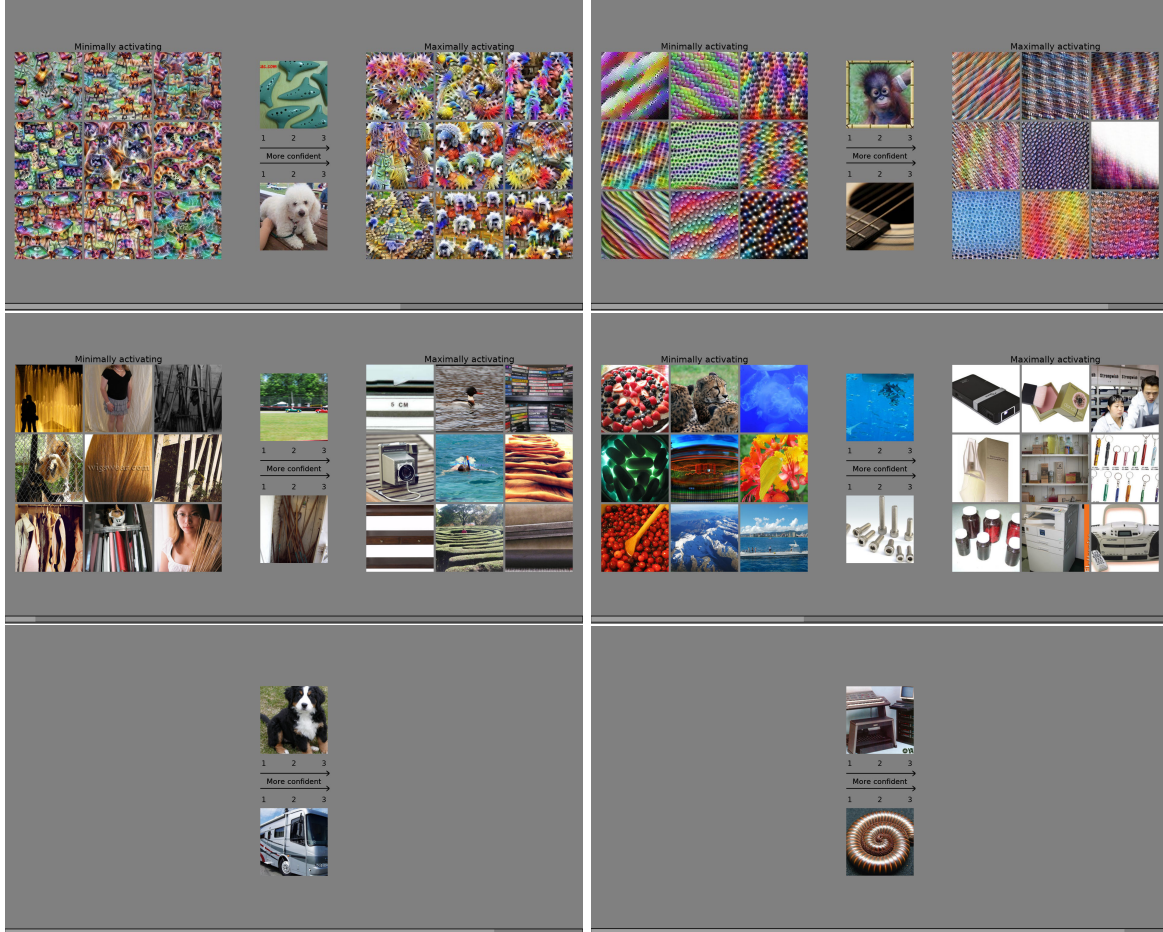

Figure 3: Experiment I: Example trials of the three reference images conditions: synthetic reference images (first row), natural reference images (second row) or no reference images (third row). The query images in the center are always natural images.

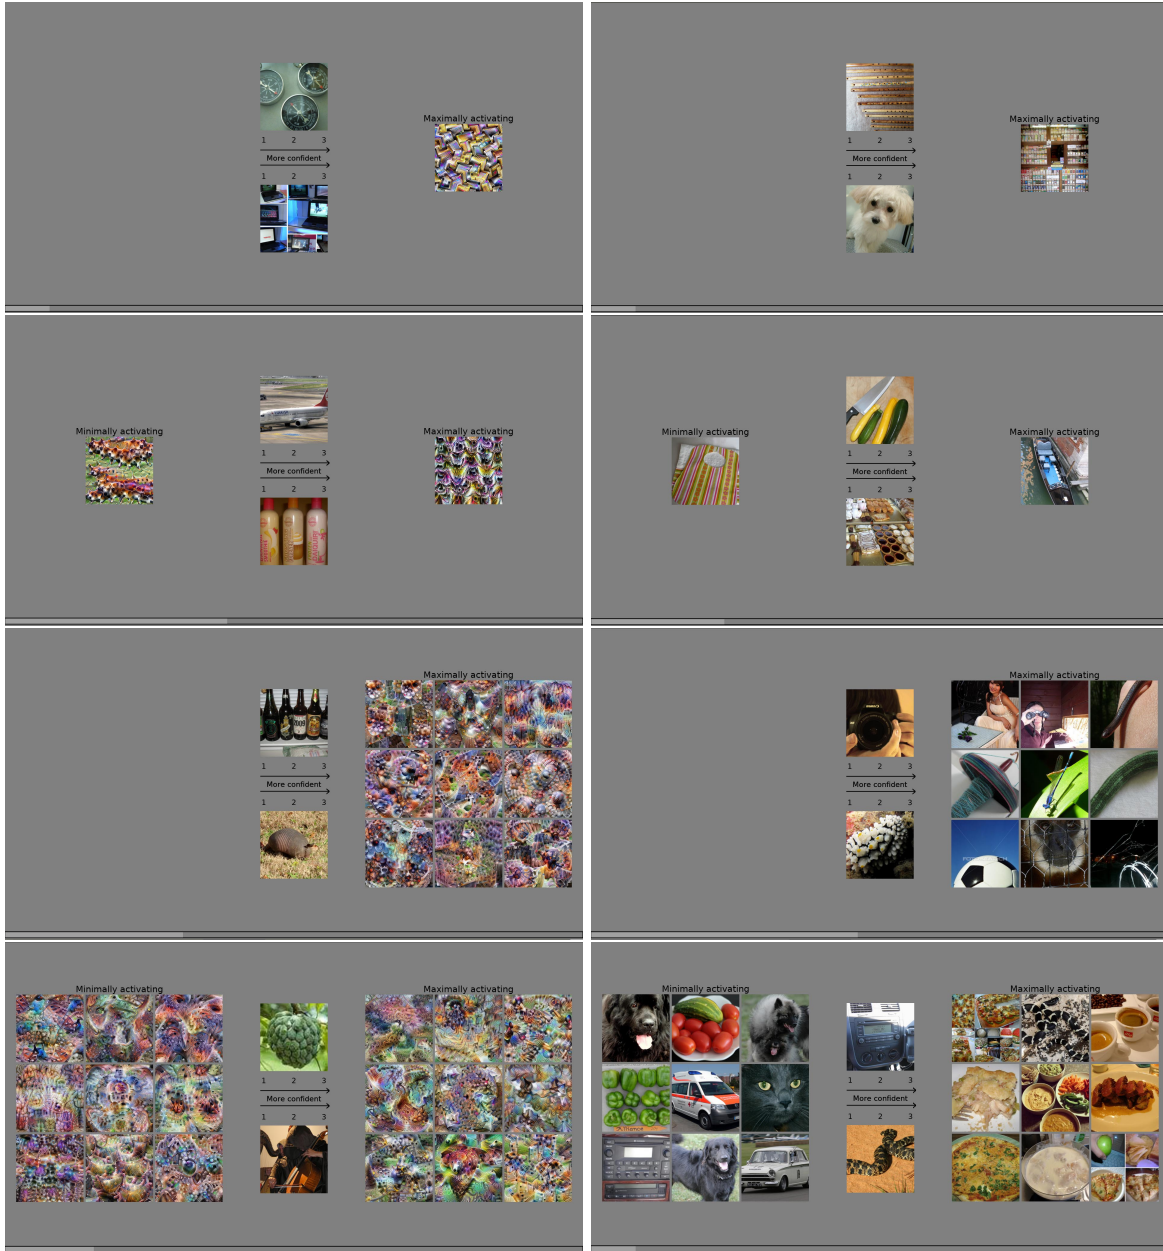

Figure 4: Experiment II: Example trials of the four presentation conditions: Max 1, Min+max 1, Max 9, Min+Max 9. The left column contains the synthetic reference images, the right column contains the natural reference images.



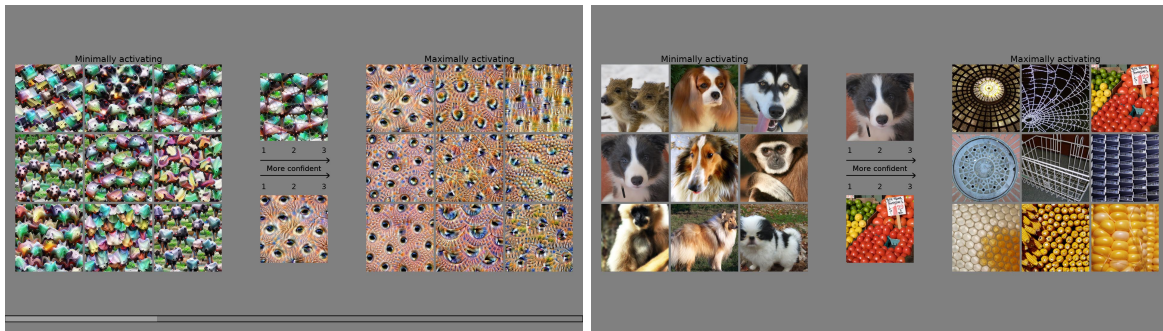

Figure 5: Catch trials. An image from the reference images is copied as a query image, which makes the answer obvious. The purpose of these trials is to integrate a mechanism into the experiment which allows to check post-hoc whether a participant was still paying attention.



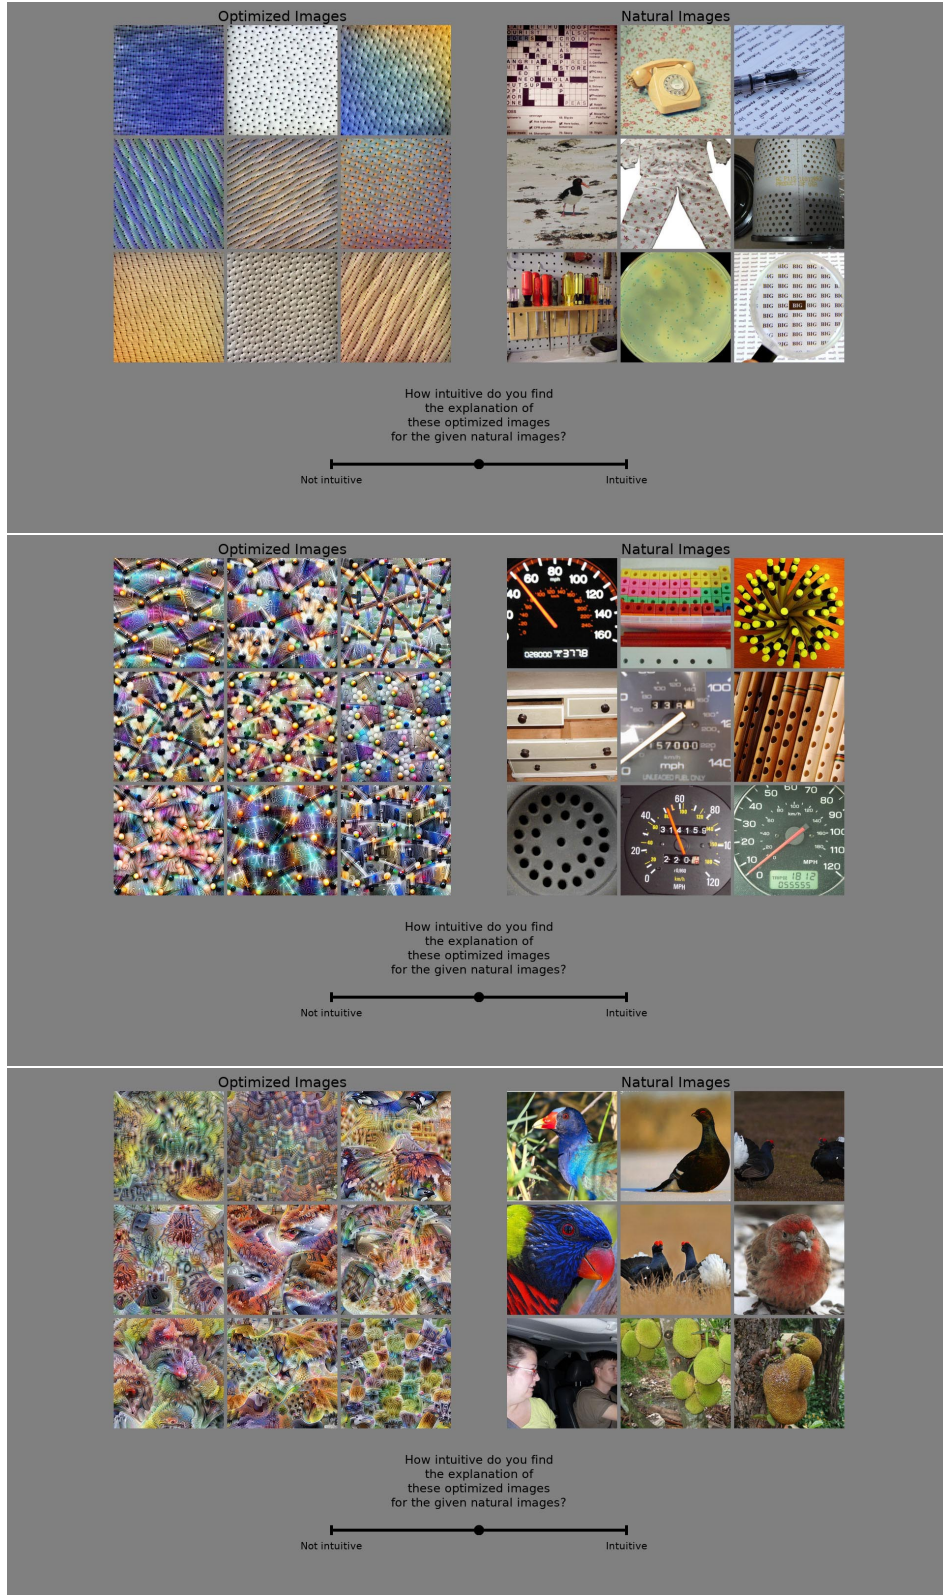

Figure 6: Trials for intuitiveness judgment. The tested feature maps are layer mixed3a (channel 43), mixed4b (channel 504) and mixed 5b (channel 17). They are the same in Experiment I and in Experiment II.
